# 1 **Neural dynamics of illusory tactile pulling sensations**

2 Jack De Havas <sup>1</sup>, Sho Ito <sup>1</sup>, Sven Bestmann <sup>2,3</sup> & Hiroaki Gomi <sup>1</sup>

3 1 NTT Communication Science Laboratories, Japan

4 2 UCL Queen Square Institute of Neurology Department of Clinical and Movement

5 Neurosciences, University College London, UK

6 3 Wellcome Centre for Human Neuroimaging, UCL Queen Square Institute of Neurology,

7 University College London, UK

## 8 **Abstract**

9 The sensation of directional forces and their associated sensorimotor commands are  
10 inextricably intertwined, complicating the identification of brain circuits responsible for  
11 tactile pulling sensations. One hypothesis is that, like tactile frequency discrimination,  
12 pulling sensations are generated by early sensory-frontal activity. Alternatively, they may  
13 be generated later in the somatosensory association cortex. To dissociate these accounts  
14 and uncouple the pulling sensation from unrelated but correlated sensory and motor  
15 processing, we combined high-density EEG with an oddball paradigm and asymmetric  
16 vibration, which creates an illusory sensation of the hand being directionally pulled.  
17 Oddballs that created a pulling sensation in the opposite direction to common stimuli were  
18 compared to the same oddballs in the context of neutral common stimuli (symmetric  
19 vibration) and to neutral oddballs. Brain responses to having directional pulling  
20 expectations violated by directional stimuli were therefore isolated. Contrary to the  
21 sensory-frontal account, frontal N140 brain activity was actually larger for neutral than  
22 pulling oddballs. Instead, pulling sensations were associated with amplitude and latency  
23 modulations of midline P200 and P3b potentials, and specifically, to contralateral parietal  
24 lobe activity 280ms post-stimulus. The timing of this activity suggested pulling sensations  
25 involve spatial processing, such as tactile remapping between coordinate frames. Source  
26 localization showed this activity to be centered on the postcentral sulcus, superior parietal  
27 lobule and intraparietal sulcus, suggesting that pulling sensations arise via the processing  
28 of body position, tactile orientation and peripersonal space. Our results demonstrate how  
29 tactile illusions can uniquely disambiguate parietal contributions to somatosensation by  
30 removing unrelated sensory processing.

## 31 **Significance statement**

32 The neural mechanisms of tactile pulling sensations are poorly understood. Competing  
33 early sensory-frontal and later somatosensory association cortex accounts are hard to  
34 dissociate due to confounding sensory and motor signals present when forces are applied  
35 to the skin. Here, we used EEG and a novel asymmetric vibration approach to induce an  
36 illusory pulling sensation, which circumvents these issues. We found that pulling  
37 sensations were associated with parietal lobe activity 280ms post-stimulus and  
38 modulations of the P200. The timing and location of this activity suggested that pulling  
39 sensations necessitate spatial processing and supported a somatosensory association  
40 cortex account of the pulling sensation.

41 **Keywords:** asymmetric vibration, somatosensory, SEP, N140, P200, P3b, tactile illusion,  
42 parietal lobe, tangential force

## 43 Introduction

44 The sensation of directional force is vital in everyday life, allowing us to, for  
45 example, know our dance partner's intention, or quickly learn the physical properties of a  
46 touched object (Johansson and Flanagan, 2009). Despite much progress in understanding  
47 peripheral tactile processing (Johansson et al., 1992a; Panarese and Edin, 2011;  
48 Pruszynski and Johansson, 2014; Pruszynski et al., 2018), little is known about how  
49 pulling sensations arise in the human brain. Research using monkeys shows that  
50 tangential forces are processed rapidly (~50ms post-stimulus) in the primary  
51 somatosensory cortex (SI) (Salimi et al., 1999; Fortier-Poisson and Smith, 2016; Fortier-  
52 Poisson et al., 2016). However, it is unclear if such processing is sufficient to give rise to  
53 directional pulling sensations.

54 Pulling sensations likely require activity beyond SI. A circuit involving SI, SII and  
55 the prefrontal cortex (PFC) has been demonstrated to underpin the perception of tactile  
56 frequency (Romo and Salinas, 2003; de Lafuente and Romo, 2006; Hernández et al.,  
57 2010). If the discrimination of directional pulling sensations requires only the accessing  
58 and comparing of stored patterns of activity in SI and SII, then these, or closely related,  
59 sensory-frontal circuits may be sufficient. If, however, directional pulling sensations  
60 necessitate spatial processing (Badde and Heed, 2016), then the parietal cortex may play  
61 an important role. On this account, activity in superior parietal lobule (SPL) and  
62 intraparietal sulcus (IPS) combine body position information with information about the  
63 spatial direction of the force to generate a directional pulling sensation (Ehrsson et al.,  
64 2003; Van Boven et al., 2005; Sack, 2009).

65 Determining precisely when pulling sensations emerge will constrain mechanistic  
66 accounts. Pulling sensations are assumed to depend on force vector extraction. If this  
67 extraction occurs during initial feedforward processing in SI and SII, early neural correlates,  
68 such as N140 enhancement, are expected. The N140 originates in SII and the PFC  
69 (Desmedt and Tomberg, 1989; Frot et al., 1999). It is a reliable marker for tactile  
70 awareness (Aukstulewicz et al., 2012; Schröder et al., 2021) and texture processing  
71 (Genna et al., 2018). Further, the N140 is modified by exogenous and endogenous  
72 attention (Nakajima and Imamura, 2000), so if pulling sensations emerge upstream,  
73 indirect, attention-related N140 enhancement should be observed. Conversely, if pulling  
74 sensations require later spatial processing, then the P200 or P3b instead will be enhanced.  
75 The pulling sensation may depend on mapping the force vector from skin centered to  
76 external coordinates, known as tactile remapping (Driver and Spence, 1998; Heed et al.,  
77 2015). Tactile remapping occurs after initial somatosensory processing and has been  
78 linked to the P200 (Longo et al., 2012; Bufalari et al., 2014).

79 Determining the neural mechanisms of pulling sensations has been difficult  
80 because traditional stimuli, such as active touch, sudden loads applied to held objects or  
81 tangential forces applied passively to the skin, are accompanied by correlated but  
82 unrelated motor and sensory processing (Johansson et al., 1992b; Birznieks et al., 2001).  
83 To disambiguate pure sensations of pulling from their conjoined sensory and motor  
84 processes, we here use an asymmetric vibration approach, which creates a strong, illusory

85 sensation of being pulled in a particular direction via a small handheld device, without  
86 active movement (Amemiya et al., 2005; Amemiya and Maeda, 2008; Tappeiner et al.,  
87 2009; Amemiya and Gomi, 2014, 2016; Tanabe et al., 2018; Gomi et al., 2019). Symmetric  
88 vibration can be used as a control stimulus, which is closely matched in terms of stimulus  
89 complexity, but does not induce an illusory pulling sensation.

90 We recorded high-density EEG while participants performed a tactile oddball task  
91 in which uncommon target stimuli must be detected from a stream of common stimuli  
92 (Shinozaki et al., 1998; Kida et al., 2003; Spackman et al., 2007). Oddballs that created an  
93 illusory pulling sensation in the opposite direction to the common stimuli (asymmetric  
94 vibration) were compared to the same oddballs in the context of neutral common stimuli  
95 (symmetric vibration), and also to neutral oddball stimuli. These relative oddball effects  
96 meant we could isolate the brain activity specific to having directional expectations  
97 contradicted by directional stimuli, and therefore determine when and where the pulling  
98 sensation emerges in the brain, helping to dissociate spatial, parietal cortex accounts from  
99 non-spatial sensory-frontal accounts.

100

## 101 **Methods**

### 102 *Equipment*

103 Participants were seated at a table approximately 40cm from a computer monitor  
104 with their right forearm resting on an adjustable arm rest (Fig. 1D.). View of the right arm  
105 was obscured by a dividing screen. Symmetric and asymmetric vibration stimuli were  
106 delivered by a small, coin-sized device (Amemiya et al., 2005; Amemiya and Gomi, 2014)  
107 covered with grip tape (sandpaper grit density = #400) that was held between index finger  
108 and thumb in a pinch grip (Fig. 1B.). An accelerometer (356A03, PCB Piezotronics, Inc.,  
109 New York, USA; sampling frequency = 4000Hz) was attached to the device.  
110 Accelerometer signals were displayed to the experimenter via an oscilloscope (TDS2004C,  
111 Tektronix, Inc., Oregon, USA), for the purposes of checking that the correct conditions  
112 were being administered at all times. Accelerometer signals were also recorded so that  
113 the precise stimulus onset time could be determined for every trial. Participants wore  
114 earplugs throughout the experiment to prevent auditory cues relating to the vibration  
115 conditions. Vibration onset timing, accelerometer recording, task instructions and fixation  
116 crosses were controlled via MATLAB (2017a) and Psychtoolbox (Brainard, 1997). Visual  
117 stimuli were displayed via a flat screen monitor (27-inch LCD, 1902 x 1080 pixels, 60 Hz  
118 refresh rate). EEG data were acquired via a 129 electrode net (HydroCel GES 300,  
119 MagstimEGI, Oregon, USA). Data were acquired at 1000Hz and Net Station EEG software  
120 (Magstim EGI, Oregon, USA).

121

### 122 *Participants*

123 We recruited 15 participants (10 males, 5 females, mean age = 33.33 yrs, SD =  
124 7.33 yrs). All participants were right handed. The sample size was chosen based on  
125 previous asymmetric vibration and somatosensory oddball EEG studies (Akatsuka et al.,  
126 2007; Spackman et al., 2007; Restuccia et al., 2009; Amemiya and Gomi, 2016).  
127 Experiments were undertaken with the understanding and written consent of each  
128 participant in accordance with the Code of Ethics of the World Medical Association  
129 (Declaration of Helsinki), and with the NTT Communication Science Laboratories  
130 Research Ethics Committee approval.

131

### 132 *Procedure*

133 Vibration stimuli were generated by a solenoid actuator within a small device held  
134 in a pinch grip. Vibration is generated by a magnet anchored between a pair springs  
135 surrounded by a pair of solenoids (Fig. 1B.). The magnet oscillated (58.8Hz) left and right  
136 in response to current passing through the solenoids. Leftward acceleration of the solenoid  
137 means the fingers receive a rightwards force (and vice versa). By varying the current in the  
138 solenoids we generated either symmetric or asymmetric left-right acceleration profiles.  
139 Under conditions of asymmetry, one force direction is rendered large and brief, while the  
140 other is small and prolonged. Due to nonlinearity in the perceptual system, only the larger  
141 of the forces is perceived despite the temporally-integrated forces in each direction being  
142 approximately equal (Amemiya et al., 2005; Amemiya and Gomi, 2014). When symmetric  
143 vibration is used both forces are equal and cancel each other out. Three forms of vibration  
144 were used throughout the experiment; asymmetric left (left pull), asymmetric right (right  
145 pull) and symmetric vibration, which is referred to as 'Neutral'.

146 First, an accuracy test was administered, in which participants received 100ms  
147 bursts of vibration and had to discriminate asymmetric (pulling) from symmetric (neutral)  
148 vibrations in a two alternative forced choice task. Responses were given with the left hand  
149 via keypad. Left and right pulling stimuli were tested in separate blocks (50 randomized  
150 trials per block, 25 per condition; block order counterbalanced). A subset of participants (n  
151 = 9) were also required to discriminate between left and right pulling stimuli under the  
152 same task conditions.

153 The main oddball task consisted of vibration stimuli delivered with a randomized ISI  
154 of 800ms-1100ms (Fig. 1A.). Vibration stimulus duration was always 100ms. In each block,  
155 one vibration pattern (Left, Right or Neutral) was the common stimulus (80% of trials) and  
156 the other two were the oddballs (each 10% of trials; total oddball = 20%). Trials were  
157 pseudorandomized, such that the first trial of every block was a common stimulus and that  
158 every oddball was followed by a common stimulus. Each block consisted of 200 trials  
159 (common = 160, oddball A = 20, oddball B = 20). There were 15 blocks in total which were  
160 randomized and counterbalanced across participants (5 blocks for each of the 3 block  
161 types, defined according to the common stimulus, i.e. Left, Right and Neutral). Thus, in

162 total there were 9 conditions, composed of three common stimuli conditions (Left, Right,  
163 Neutral, 800 trials per condition) and 6 oddball stimuli conditions (120 trials per condition).  
164 Oddball conditions were grouped into three conditions (Fig. 1C.): ‘Opposite pull oddballs’  
165 (Right oddballs during Left common and Left oddballs during Right common), ‘Pull oddball  
166 after neutral’ (Right oddballs during Neutral common and Left oddballs during Neutral  
167 common), and ‘Neutral oddball’ (Neutral oddballs during Left common and Neutral  
168 oddballs during Right common).

169 Participants were informed at the start of each block which stimulus was the  
170 common and which two were the oddball. They were instructed to pay attention to all  
171 stimuli and silently count the number of oddballs. At the end of each block they reported  
172 their estimate for the number of oddballs by responding to options presented on screen.  
173 Thus, they always simultaneously responded to two oddball conditions, helping to ensure  
174 that their effort levels were well controlled across conditions. Participants were naive to the  
175 purpose of the experiment when asked directly at the end of testing. The experiment  
176 lasted ~2.5 hours.

## 177 *Analysis*

### 178 **Behavioral data**

179 Accuracy on the pre-test pulling direction discrimination task was determined for  
180 each participant by taking the sum of correctly identified pulling and neutral stimuli as a  
181 percentage of the total number of trials. Left and Right pulling conditions were calculated  
182 separately and compared via paired sample t-test. In the subset of participants ( $n = 9$ ) who  
183 also completed a Left vs. Right pull discrimination block, we calculated the percentage  
184 correct in the same manner and compared this value to the mean of the Left vs. Neutral  
185 and Right vs. Neutral values via paired sample t-test. Oddball counting error was  
186 calculated for each block of the main task by taking the absolute of the estimated number  
187 of oddballs minus the actual number of oddballs. Oddball counting error was compared  
188 across participants via Wilcoxon signed-rank test. We compared blocks where the left pull  
189 was the common stimulus to blocks where right pull was the common stimulus, and we  
190 compared the average of these two blocks to blocks in which neutral was the common  
191 stimulus.

192 From the two behavioral tasks we extracted 4 variables that were to be used in  
193 covariate analyses with the EEG data: pre-test Pull vs Neutral discrimination (mean of left  
194 vs neutral and right vs neutral block), mean oddball counting error (i.e. across all blocks),  
195 Left/right common oddball counting error (mean of performance on blocks where left and  
196 right pull were the common stimulus), and Neutral common oddball counting error.

### 197 **EEG pre-processing**

198 EEG data were pre-processed using EEGLab (Delorme and Makeig, 2004) and  
199 custom Matlab (2017a) scripts. The data were down sampled to 250Hz for storage  
200 purposes. We re-referenced the data to the left and right mastoid electrodes and applied a  
201 bandpass (FIR 0.1 – 90Hz) and notch filter (48-52Hz). ICA components reflecting blinks,  
202 eye movements, heart, large EMG and electrical artefacts were then removed. Epochs  
203 were extracted (-200 – 700ms) and baselined (-100 – 0ms) for each participant. Electrodes  
204 from the face and side of the head below the ear were removed due to muscle activity  
205 artifacts in some participants, leaving a total of 93 electrodes, covering the entire scalp  
206 (Fig. 1E.). We removed trials still displaying artefacts via whole brain threshold (+/-80 $\mu$ V)  
207 and by applying the ERPLab step function algorithm to frontal electrodes (window size =  
208 200ms, step size = 50ms, threshold = 50 $\mu$ V). The mean percentage of trials rejected per  
209 participant was 9.62%. ERPs were averaged across conditions and smoothed using a low  
210 pass filter (second order Butterworth, cutoff 30Hz).

### 211 **EEG analysis in surface space using SPM**

212 We analyzed the EEG data in two ways. Firstly, to avoid the bias inherent to  
213 picking electrodes and time windows, we used SPM 12 for M/EEG (Litvak et al., 2011) to  
214 analyze scalp data across the response window and then to perform source  
215 reconstructions of scalp activity. SPM controls for multiple comparisons using Random  
216 Field Theory (RFT), which is effective because of the temporal and spatial smoothness of  
217 EEG data (Kilner and Friston, 2010). Statistical parametric maps were created for each  
218 participant in each condition by interpolating from all electrodes into two-dimensional  
219 sensor space across the response window (0-500ms post stimulus onset), thus creating a  
220 3D characterization of the ERP (16mm x 16mm x 0ms smoothing).

221 To determine if 'Opposite pull oddball' produced a larger response than the 'Pull  
222 oddball after neutral' conditions, it was only necessary to perform a paired t-test (1-tailed)  
223 because both oddball conditions used the same common stimulus condition (i.e. common  
224 pull). We also ran the same t-contrast using our behavioral variables as covariates.  
225 However, we also wanted to check if there were any differences between the 'Neutral  
226 oddball' condition and the other two oddball conditions, for which we needed to use a  
227 partitioned error approach (random effects analysis), combined with two separate 2x2  
228 within-subject's ANOVAs with factors of oddball condition (Neutral oddball vs Opposite pull  
229 oddball or Pull oddball after neutral) and stimulus type (oddball vs common). For these  
230 analyses image files (SPM maps; NIFTI) were transformed into four sets of differential  
231 effects (overall effect, main effect of condition, main effect of type, condition x type  
232 interaction) for each participant (1<sup>st</sup> level contrasts), which were then entered into four  
233 separate one-sample t-tests (2<sup>nd</sup> level contrasts; for details see Franz et al., 2020). Of  
234 these contrasts, only the condition x type interaction was of interest because this contrast  
235 showed the effect of the oddball condition, whilst controlling for the common stimulus. For

236 all scalp activity contrasts we used a threshold of  $p < 0.001$  uncorrected and clusters were  
237 only included if they met the more stringent  $p < 0.05$  family-wise cluster threshold.

### 238 **EEG source localization**

239 To locate the possible cortical origins of activity detected on the scalp we ran SPM  
240 3-D source reconstruction, using a group inversion approach (COH, 0-500ms, Hanning  
241 taper, 0-256Hz) to compensate for head anatomy and sensor noise variation (Litvak and  
242 Friston, 2008). An MNI template was used to construct the mesh, coregistration used the  
243 nasion and bilateral preauricular points as fiducials, and a forward model was created with  
244 the Boundary Elements Model (BEM). NIFTI (source-level) images (8mm smoothing) were  
245 extracted using a time window derived from the 'Opposite pull oddball' vs 'Pull oddball  
246 after neutral' scalp analysis (264-320ms). To better refine the location of the activity, NIFTI  
247 images were subjected to a paired sample t-test with a general threshold set at  $P < 0.05$   
248 uncorrected, and selected the top cluster of activity (i.e. the cluster that contained the  
249 highest peak t-values). Due to the problem of circularity, this statistical test was used  
250 purely to better locate the already observed scalp effect (Oh et al., 2020), and to negate  
251 the issue of central attraction during source analysis, whereby at the group-level sources  
252 can tend to accumulate in biologically implausible central regions of the brain.

253 To better understand the location of our cluster of pulling related activity, we  
254 compared it to the origin of the P50 generated in response to the Neutral common stimuli  
255 (an ERP independent of the main 'Opposite pull oddball' vs 'Pull oddball after neutral'  
256 comparison), since the P50 is known to originate in SI (Allison et al., 1992). For this  
257 visualization we ran the same SPM group inversion but using a window of -100-100ms and  
258 contrasted (paired sample t-test) the baseline period (-100-0ms) with the P50 window (40-  
259 64ms) in the Neutral common condition, threshold at  $P < 0.0006$  uncorrected. The  
260 threshold was chosen so that the top cluster contained approximately the same number of  
261 voxels (2018 voxels) as the 'pulling related activity' cluster (2012 voxels).

262 The location of these clusters of brain activity was compared using the SPM  
263 anatomy toolbox (Eickhoff et al., 2005), which provides a list of brain areas ranked  
264 according to the likelihood that the observed activity originates within their probabilistically  
265 defined boundaries. We considered the top five areas to be representative of the cluster  
266 origin, given the spatial limitations of EEG. Ratios (Table 1) are calculated automatically by  
267 the toolbox for each area by dividing the mean probability at cluster location by the mean  
268 probability across the entire probability map of the brain. Higher values indicate location  
269 more towards the center of the area.

### 270 **Traditional ERP analysis**

271 We also used a traditional ERP approach using ERPLab (Lopez-Calderon and Luck,  
272 2014), in which we selected electrode locations and time windows based on previous

273 research (Allison et al., 1992; Kekoni et al., 1997; Akatsuka et al., 2005; Shen et al., 2018),  
274 wide ERP windows were favored to avoid biasing conditions where the ERPs were  
275 flattened due to greater onset variability (Luck, 2014). Epochs were averaged for each of  
276 the 9 conditions and oddball difference waves were calculated by subtracting the activity of  
277 each stimulus when it was acting as the common stimulus from the activity of the same  
278 stimulus when it was acting as an oddball (Pulvermüller et al., 2006). Left and right  
279 directional versions of each oddball difference wave were averaged together to give the  
280 final experimental condition (Opposite pull oddball), and two other oddball conditions ('Pull  
281 oddball after neutral' and 'Neutral oddball'), oddball difference waves.

282           Mean amplitude of the P50 (30 - 70ms), N140 (100 - 150ms), P200 (150 – 250ms)  
283 and P3b (250 – 500ms) event related potentials (ERPs) were quantified from the epoched  
284 and difference wave data for each condition. We calculated the onset latency of all ERPs  
285 by calculating the point where the signal reached 50% of the peak value within each time  
286 window. In line with previous literature, P50 analysis was based on the 6 electrodes  
287 surrounding P3, N140 analysis was based on the 5 electrodes surrounding F3, while P200  
288 and P3b analysis was based on the 5 electrodes surrounding Cz. ERP measures were  
289 compared across conditions via paired sample t-tests. Our main comparison concerned  
290 the ERP responses in the 'Opposite pull oddball' condition compared to the 'Pull oddball  
291 after neutral' condition, however we also compared the 'Opposite pull oddball' condition to  
292 the 'Neutral oddball' condition and compared the 'Pull oddball after neutral' condition to the  
293 'Neutral oddball' condition.

294

295

296

297

298

299

300

301

302

303



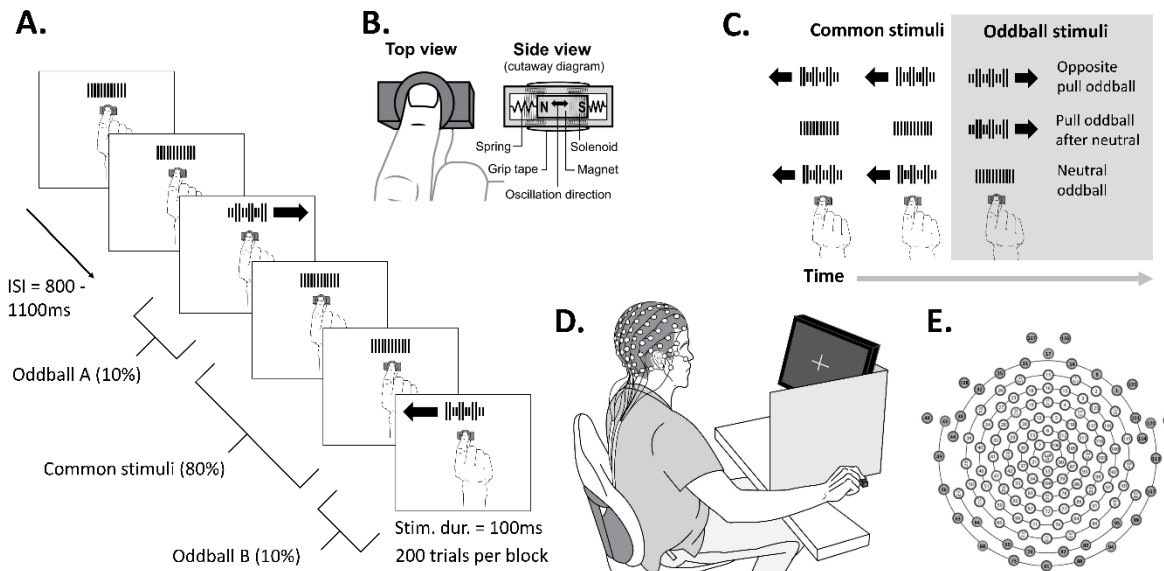

304

305

306

307

308 **Figure 1: Task design and experimental setup.**

309 **A.** Task design showing a single block in which Neutral (symmetric vibration) is the common  
310 stimulus and Left and Right pull (asymmetric vibration) are the randomly appearing Oddballs. Note  
311 that there were two other types of blocks, in which the Left and Right pulling stimuli acted as the  
312 common stimuli, with the oddballs being Neutral and Right, and Neutral and Left respectively.  
313 Participants had to silently count all oddballs and report their count at the end of the block.

314 **B.** Close up of the device used to generate asymmetric and symmetric vibration, showing top and  
315 cutaway view. Different acceleration profiles of the oscillating magnet were created by varying the  
316 current in the solenoids.

317 **C.** The three oddball conditions consisted of the 'Opposite pull oddball' condition (Right pull  
318 oddballs after Left pull common and Left pull oddballs after Right pull common), the 'Pull oddball  
319 after neutral' condition (Left and Right pull oddballs after Neutral common), and the 'Neutral oddball'  
320 condition (Neutral oddballs after Left and Right common).

321 **D.** Experimental setup showing participant holding the unattached vibrating device in their right  
322 hand using a pinch grip whilst high-density EEG was recorded.

323 **E.** Diagram showing relative location of the 129 electrodes. Electrodes from face, ears and neck  
324 (shown in grey) were excluded from main analysis due to artefacts.

325

326

327

328

## 329 Results

### 330 Pulling related activity 280ms post-stimulus over the parietal lobe

331 We combined a tactile oddball task, in which uncommon target stimuli must be  
332 detected from a stream of common stimuli, with asymmetric (left/right pulling) and  
333 symmetric vibration (neutral) stimuli (Fig. 1.). ERPs from all conditions can be seen in  
334 Figure 2. The purpose of our main contrast, comparing the 'Opposite pull oddball'  
335 condition and 'Pull oddball after neutral' condition (Fig. 1C.) was to find brain activity  
336 specific to having a directional pulling expectation violated by a different directional pull (i.e.  
337 expect left but get right pull). We analyzed the entire response window for significant  
338 clusters in an unbiased manner. This revealed a cluster of significant activity (264-320ms)  
339 that peaked over the left parietal cortex (280ms post-stimulus onset) and extended  
340 anteriorly to cover part of the left frontal lobe by ~300ms post-stimulus onset (Figs. 5A- 5C).

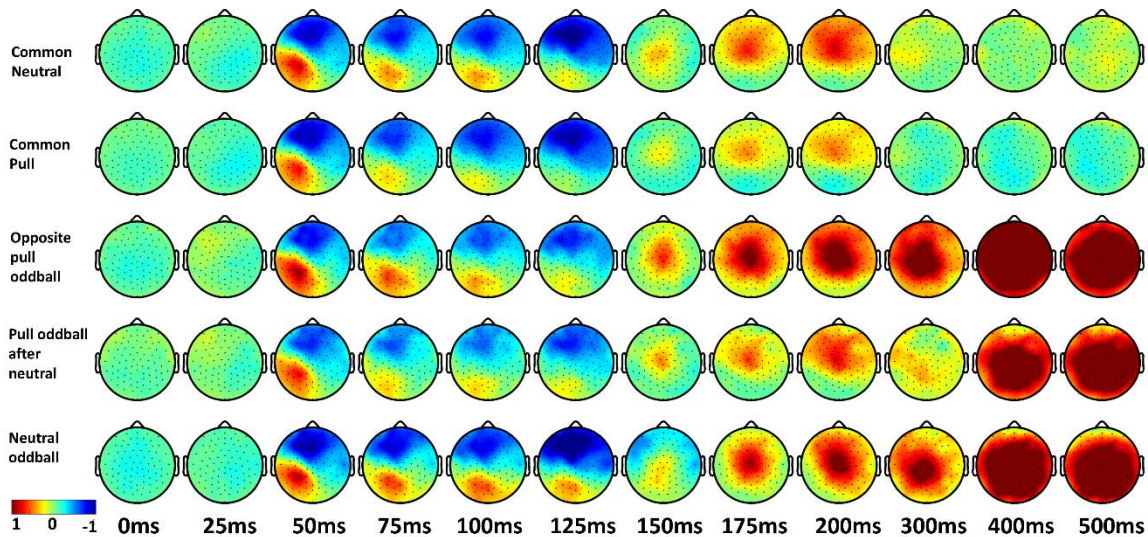

341

342

343 **Figure 2. Instantaneous ERP amplitude across conditions.** The amplitude ( $\mu\text{V}$ ) of  
344 scalp activity across time in the two common stimulus conditions: 'Common neutral' and  
345 'Common pull' (mean of Left and Right common), and in the three Oddball conditions:  
346 'Opposite pull oddball' (mean of Left oddball after right common and Right oddball after  
347 Left common), 'Pull oddball after neutral' (mean of Left oddball after Neutral common and  
348 Right oddball after Neutral common), and 'Neutral oddball' (mean of Neutral oddball after  
349 Left common and Neutral oddball after Right common).

350

351

352 **Pulling related activity is spatiotemporally distinct from early processing in sensory**  
353 **and frontal regions**

354 An early sensory-frontal account of the pulling sensation predicts pulling-related  
355 amplitude enhancements of the N140. However, the reverse was observed and we did not  
356 find evidence that the N140 indexes the pulling sensation. (Fig. 3C-3D; Tables 2 & 3). If  
357 the N140 indexed the pulling sensation it should have been present in the ‘Opposite pull  
358 oddballs’ condition difference waves (Fig. 3D; red line) and larger than the other two  
359 oddball conditions (i.e. more negative). In fact, the mean difference wave from  
360 contralateral frontal sites was slightly *positive* in the ‘Opposite pull oddballs’ condition and  
361 did not differ from that seen in the ‘Pull oddball after neutral’ condition (0.19 $\mu$ V vs 0.19 $\mu$ V;  $t$   
362 (14) = -0.099,  $p$  = 0.923, Cohen’s  $d$  = -0.02). Indeed, only in the ‘Neutral oddball’ condition  
363 was the difference wave negative during the N140 window, with the N140 being  
364 significantly larger than that observed for the ‘Opposite pull oddballs’ condition (-0.17 $\mu$ V vs  
365 0.19 $\mu$ V;  $t$  (14) = 2.595,  $p$  = 0.021, Cohen’s  $d$  = 0.84) and the ‘Pull oddball after neutral’  
366 condition (-0.17 $\mu$ V vs 0.19 $\mu$ V;  $t$  (14) = 2.599,  $p$  = 0.021, Cohen’s  $d$  = 0.98). There were no  
367 differences in N140 onset latency across conditions (Tables 2 & 3).

368 We did not observe any differences in the P50 amplitude or latency across oddball  
369 conditions (Fig. 3B.; Tables 2 & 3). An early, sensory-frontal account predicts higher  
370 feedforward activity in SI, which we did not observe. Nevertheless, it is difficult to conclude  
371 anything from this null result, which could simply be due to noise in the data.

372 Next, we sought to determine whether pulling related activity was spatially distinct  
373 from early sensory activity. The results must be interpreted cautiously owing to the inverse  
374 problem and poor spatial acuity of the EEG signal (Grech et al., 2008). Group inversion of  
375 the pulling-related scalp activity (Fig. 5D, red and green patches; Table 1) suggested an  
376 origin in the left parietal cortex, corresponding to the postcentral sulcus, superior parietal  
377 lobule (SPL) and the intraparietal sulcus (IPS). The SPM anatomy toolkit indicated that the  
378 cluster was centered on the IPS (Fig. 5.; Table 1).

379 For comparison we analyzed the approximate location of SI using the Neutral  
380 common condition P50 activity, since the P50 has been shown to have its main origin  
381 inside SI (Allison et al., 1992). This cluster was found to be located somewhat anterior,  
382 though partially overlapping with, our pulling related cluster of activity (Fig. 5D, blue and  
383 green patches; Table 1). The SPM anatomy toolkit indicated there was some P50 activity  
384 in the postcentral sulcus and SPL, as with the pulling related activity. However, unlike the  
385 pulling related activity, the P50 cluster was not strongly represented in the IPS, and  
386 instead was represented in the postcentral gyrus, consistent with the approximate location  
387 of the SI hand area (Holmes et al., 2019).

388 Taken together the results argue against an early sensory-frontal account of the  
389 pulling sensation. The N140 was, contrary to the sensory-frontal account, attenuated for  
390 pulling oddballs and enhanced for neutral oddballs. Pulling related activity occurred later  
391 (280ms; see also P200 and P3b results below) and was centered on the parietal

392 association cortex, overlapping with, but spatially distinct from the site of early sensory  
393 activity.

#### 394 **Lack of significant activity when comparing to neutral oddballs**

395 We did not observe any significant clusters of activity when the 'Neutral oddball'  
396 condition was compared to either of the other two oddball conditions using the SPM scalp  
397 analysis. This may in part have been due to the large P3b generated by Neutral oddballs  
398 (Fig. 4.) which obscured any differences between the 'Neutral oddball' and 'Opposite pull  
399 oddball' conditions (*see below and discussion*).

#### 400 **Pulling related activity associated with earlier and larger P200 and P3b responses**

401 The 'Opposite pull oddball' condition was associated with larger amplitude P200  
402 responses than the 'Pull oddball after neutral' condition ( $0.68\mu\text{V}$  vs  $0.27\mu\text{V}$ ;  $t(14) = 2.818$ ,  
403  $p = 0.014$ , Cohen's  $d = 0.72$ ; Fig 4; Tables 2 & 3) and the 'Neutral oddball' condition  
404 ( $0.68\mu\text{V}$  vs  $0.18\mu\text{V}$ ;  $t(14) = 2.24$ ,  $p = 0.042$ , Cohen's  $d = 0.79$ ). P200 latency was also  
405 shorter for the 'Opposite pull oddball' condition compared to the 'Pull oddball after neutral'  
406 condition ( $173.03\text{ms}$  vs  $193.91\text{ms}$ ;  $t(12) = -2.388$ ,  $p = 0.034$ , Cohen's  $d = -0.85$ ), but not  
407 when the Opposite pull oddball' condition was compared to the 'Neutral oddball condition'  
408 ( $t(13) = -0.799$ ,  $p = 0.439$ ).

409 For the P3b the 'Opposite pull oddball' condition was also associated with larger  
410 amplitude ( $2.07\mu\text{V}$  vs  $1.25\mu\text{V}$ ;  $t(14) = 2.499$ ,  $p = 0.026$ , Cohen's  $d = 0.62$ ; Fig. 4; Tables 2  
411 & 3) and shorter latency ( $335.42\text{ms}$  vs  $382.84\text{ms}$ ;  $t(14) = -3.84$ ,  $p = 0.002$ , Cohen's  $d = -$   
412  $1.07$ ) responses compared to the 'Pull oddball after neutral' condition. No significant  
413 differences in P3b amplitude or latency were observed when comparing the 'Opposite pull  
414 oddball' condition with the 'Neutral oddball' condition (Fig. 4; Tables 2 & 3.). This was likely  
415 because the P3b was larger than expected in the 'Neutral oddball' condition. Indeed, for  
416 the P3b, compared to the 'Pull after neutral oddball' condition, the 'Neutral oddball'  
417 condition was associated with earlier ERP onset latencies ( $t(14) = 5.221$ ,  $p < 0.001$ ,  
418 Cohen's  $d = 0.93$ ) and a trend towards larger mean amplitudes ( $t(14) = -2.118$ ,  $p = 0.053$ ,  
419 Cohen's  $d = 0.34$ ; Fig. 4; Tables 2 & 3.).

420

#### 421 **Opposite direction pulls easier to discriminate behaviorally**

422 We tested participants' ability to discriminate between the three different types of  
423 stimuli (Left/Right pulls and Neutral). All participants were able to clearly feel the pulling  
424 sensation (Fig. 3A). A subset of tested participants was better at discriminating Left vs.  
425 Right than discriminating Left/Right vs Neutral ( $93.78\%$  (SD = 7.03) vs.  $86.22\%$  (SD =  
426 6.83);  $t(8) = -2.591$ ,  $p = 0.032$ , Cohen's  $d = 1.09$ ; Fig. 3A. right panel). This finding was  
427 expected, given that Left/Right discrimination is similar to the 'Opposite pull oddball'  
428 condition, which was associated with the strongest brain response across conditions. We  
429 did not find any difference in pre-test pulling discrimination accuracy when comparing Left  
430 vs. Neutral to Right vs. Neutral ( $85.33\%$  (SD = 7.62) vs.  $81.45\%$  (SD = 14.9);  $t(14) = -$

431 1.439,  $p = 0.172$ ; Fig. 3A. left panel). When asked, participants reported that neutral stimuli  
 432 (symmetric vibration) were subjectively similar to asymmetric vibration, aside from the  
 433 absence of the pulling sensation.

434 Responses were not biased to the left or right. Participants did not differ in their  
 435 propensity to respond left as opposed to neutral (47.6% vs. 52.4%;  $t(14) = 1.103$ ,  $p =$   
 436  $0.288$ ) or right as opposed to neutral (53.07% vs. 46.93%;  $t(14) = -1.667$ ,  $p = 0.118$ ) during  
 437 the pre-test discrimination task. Likewise, there was no difference when left and right were  
 438 compared directly, either using the discrimination from neutral conditions ( $t(14) = 0.544$ ,  $p$   
 439  $= 0.595$ ) or when left and right pulling sensations were discriminated from one another  
 440 directly (52.22% vs 47.78%;  $t(8) = -0.989$ ,  $p = 0.352$ ).

441 During the main task, oddball counting error did not differ when comparing Left  
 442 Common to Right Common blocks (5.49 (SD = 3.23) vs 4.73 (SD = 2.51);  $Z = -0.483$ ,  $p =$   
 443  $0.631$ ) or when comparing mean Left/Right common blocks to Neutral common blocks  
 444 (5.11 (SD = 2.34) vs 5.73 (SD = 2.34);  $Z = 1.079$ ,  $p = 0.28$ ). This lack of difference  
 445 suggests there were no major differences in performance level, effort or attention across  
 446 block types, which, if present, could have confounded our interpretation of the EEG results.

447 The behavioral measures were added as covariates in our SPM analyses, but the  
 448 results did not substantially change (Table 4), ruling out the possibility that our clusters of  
 449 significant activity were artefacts of extremes of task performance.

450 **Table 1:** Cluster locations for pull related activity (Opposite pull oddballs vs Pull oddball  
 451 after neutral) and Neutral common P50 activity, based on maximum probability maps.  
 452 Estimates of activated areas were based on clusters of 2012 ( $p < 0.05$ ) and 2018 ( $p <$   
 453  $0.0006$ ) voxels respectively. Only the five areas calculated to be the most likely origin for  
 454 activity area shown, sorted according to percent of the cluster volume found in each area.  
 455 Note that high ratio values indicate higher probabilities that the cluster had an origin in the  
 456 specific brain area (see methods for details).

457

| Contrast                 | Assignment based on<br>Maximum Probability Map | Percent of Cluster<br>volume in Area | Percent of Area<br>activated by Cluster | Ratio |
|--------------------------|------------------------------------------------|--------------------------------------|-----------------------------------------|-------|
| Pull related<br>activity | Area 7A (SPL)                                  | 11.6                                 | 13.5                                    | 1.13  |
|                          | Area 2                                         | 8                                    | 15.5                                    | 1.01  |
|                          | Area hIP2 (IPS)                                | 7.2                                  | 25.7                                    | 1.77  |
|                          | Area hIP6 (IPS)                                | 5.9                                  | 15.4                                    | 1.33  |
|                          | Area hIP3 (IPS)                                | 4.6                                  | 11                                      | 0.81  |
| Neutral<br>common P50    | Area 2                                         | 15.8                                 | 30.6                                    | 1.23  |
|                          | Area 3b                                        | 11.7                                 | 16.6                                    | 1.28  |
|                          | Area 7A (SPL)                                  | 9.3                                  | 10.9                                    | 1.48  |
|                          | Area 4p                                        | 6.6                                  | 24.9                                    | 1.55  |
|                          | Area 3a                                        | 5.2                                  | 23.8                                    | 1.37  |

458

459

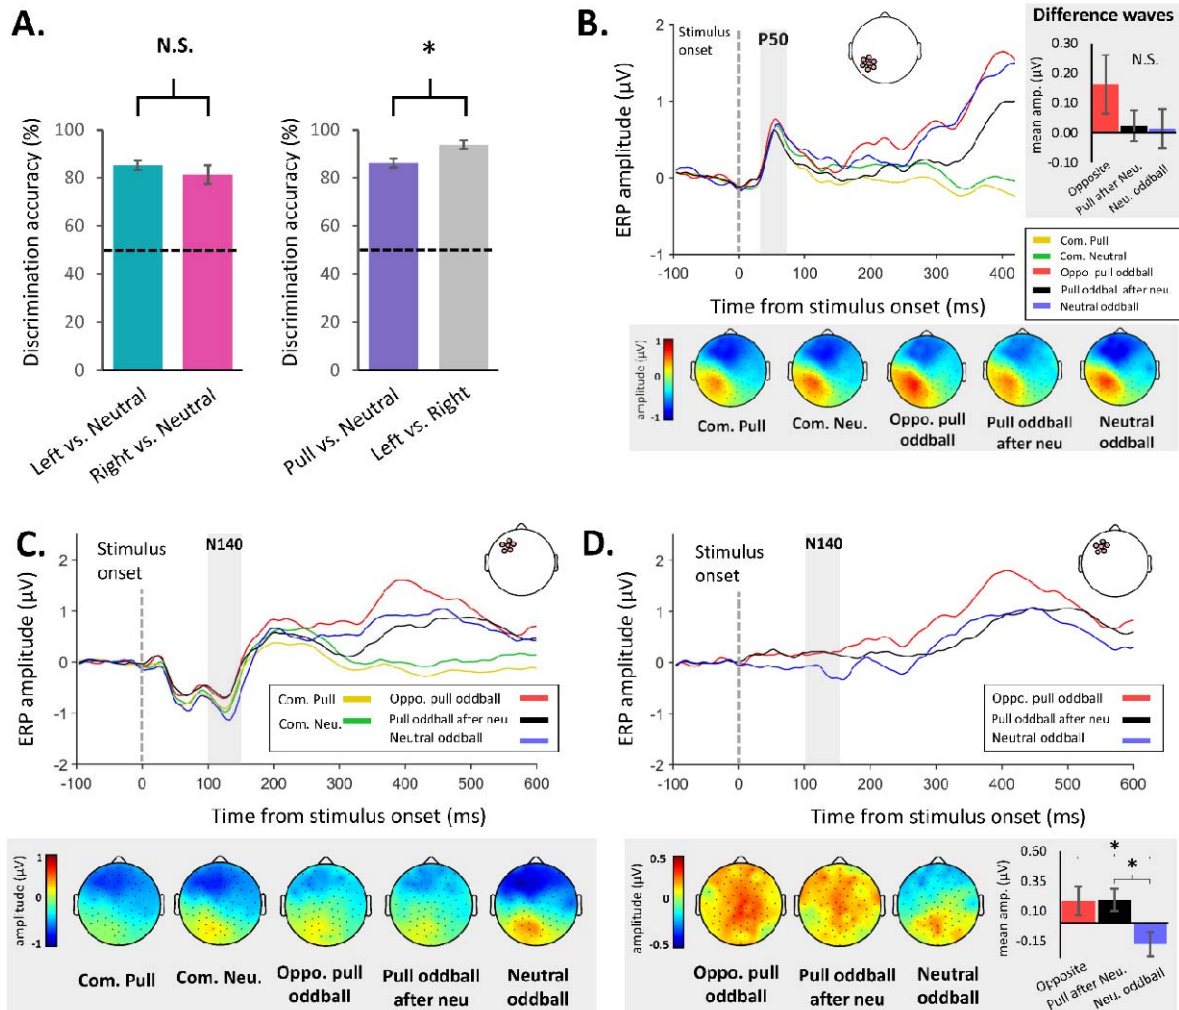

460

461 **Figure 3. Behavioral, P50 and N140 ERP results**

462 **A.** Group mean pre-test pulling discrimination accuracy was high in all conditions,  
 463 indicating that all experimental stimuli could clearly be perceived. There was no difference  
 464 in participants' ability to discriminate Left and Right pulls (asymmetric vibration) from  
 465 Neutral stimuli (symmetric vibration), but performance was better in a subset (n = 9) when  
 466 discriminating Left from Right pulls as opposed from discriminating either of the pulling  
 467 stimuli from the Neutral stimulus. \*  $p < 0.05$ , N.S. = Not Significant.

468 **B.** Group mean P50 amplitude and scalp maps (30-70ms) for all conditions. When  
 469 comparing difference waves across the three oddball conditions over the contralateral  
 470 parietal cortex there was no difference in mean amplitude. N.S. = Not Significant.

471 **C.** Group mean N140 amplitude and scalp maps (100-150ms) for all conditions.

472 **D.** Difference waves from contralateral frontal electrodes showing larger N140 for the  
473 'Neutral oddball' condition compared to the 'Opposite pull oddball' and Pull oddball after  
474 neutral' condition. \*  $p < 0.05$ , N.S. = Not Significant.

475

476

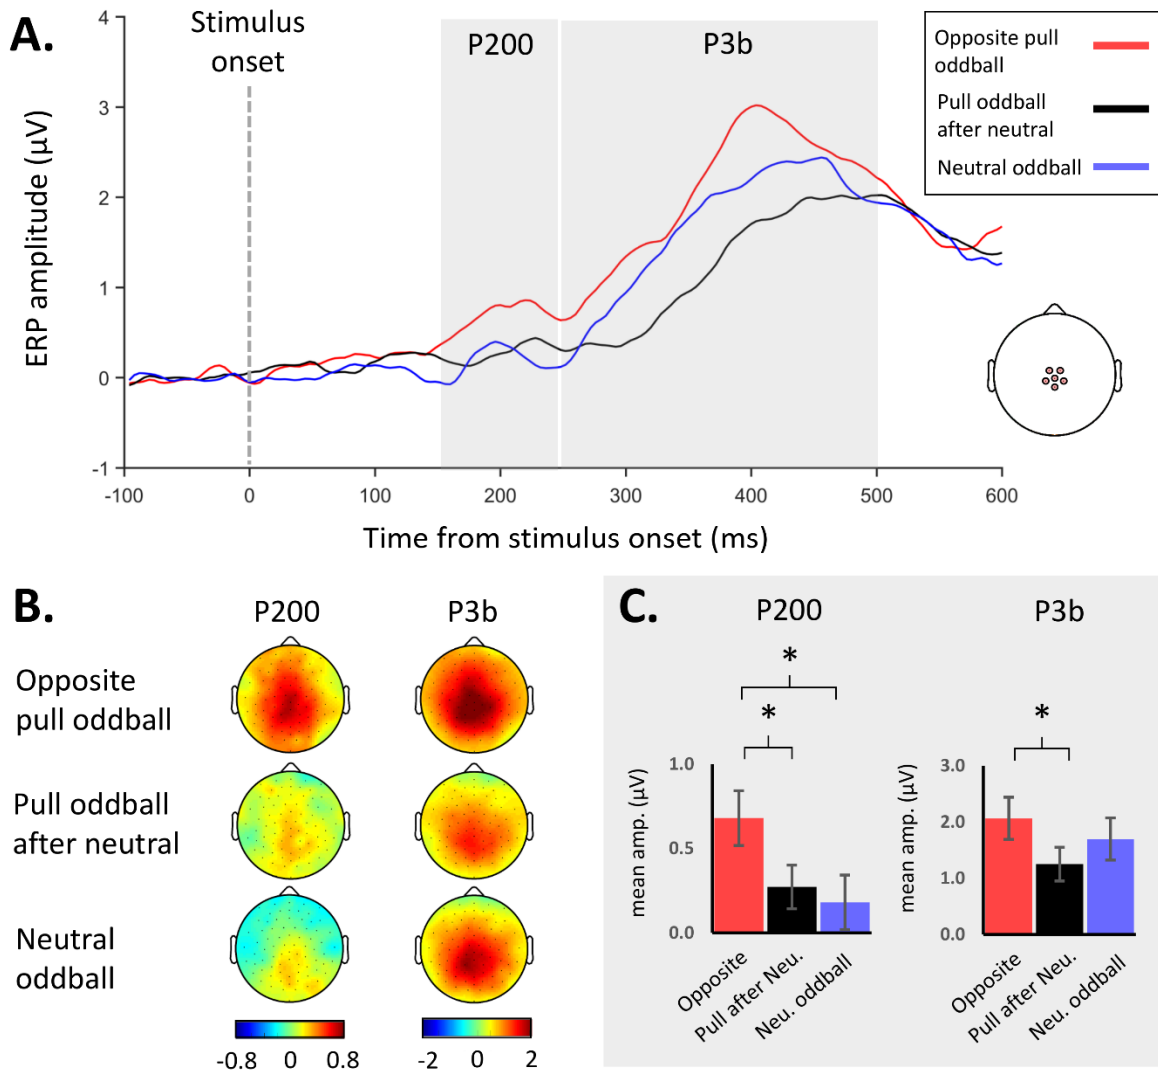

477

478 **Figure 4. P200 and P3b oddball effects across conditions.**

479 **A.** Group average ERP oddball difference waves (subtraction of activity related to common  
480 stimuli) from central electrodes shown for the three oddball conditions. P200 (150-250ms)  
481 and P3b (250-500ms) windows shown in grey.

482 **B.** Group average difference wave scalp activity for the P200 and P3b in each of the three  
483 oddball conditions.

484 **C.** Group average P200 amplitude was significantly larger in the ‘Opposite pull oddball’  
485 condition than both the other two oddball conditions, while P3b activity was larger in the  
486 ‘Opposite pull oddball’ condition than the ‘Pull oddball after neutral’ condition. \*  $p < 0.05$ .

487

488

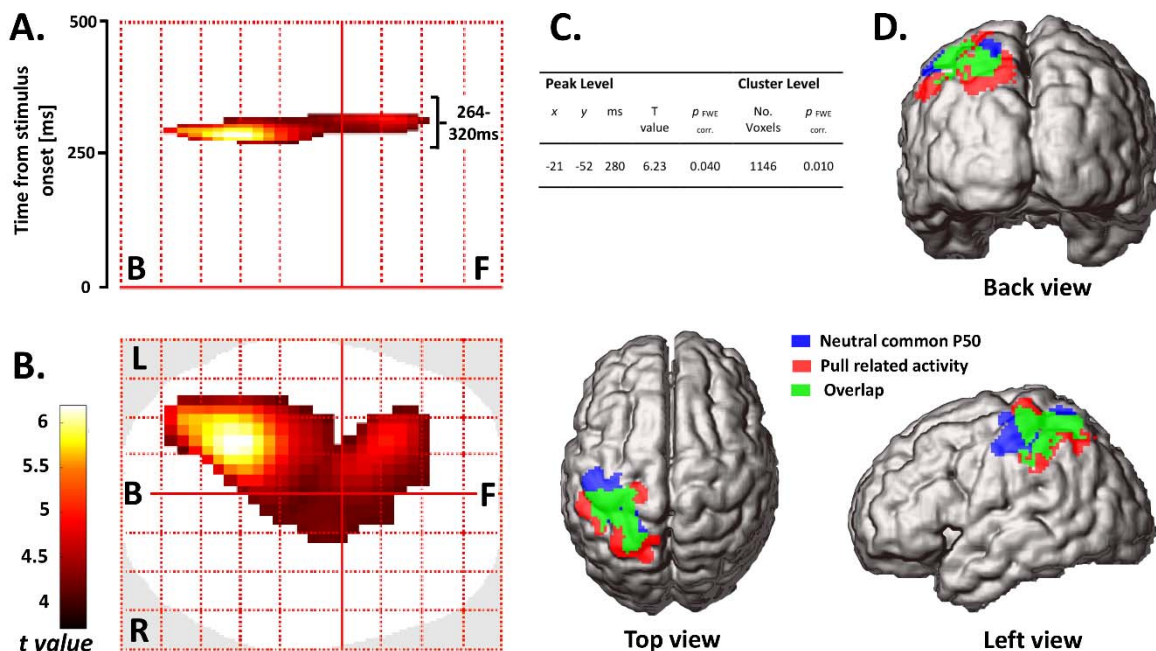

489

490

491 **Figure 5. Brain activity associated with the pulling sensation.**

492 **A-C.** Results of SPM topographical analysis in sensor space when contrasting the  
493 ‘Opposite pull oddball’ and ‘Pull oddball after neutral’ conditions. A cluster of significant  
494 activity ( $p < 0.001$  uncorrected,  $p < 0.05$  FWE cluster threshold) was observed (264-320ms  
495 after stimulus onset), peaking at 280ms over the left parietal cortex and extending  
496 anteriorly. In table, x position is positive-going left to right, y position is positive-going from  
497 posterior to anterior.

498 **D.** Group inversion ( $p < 0.05$  uncorrected) suggested the significant scalp activity  
499 originated from the left parietal cortex. To clarify the location of this activity we conducted a  
500 separate group inversion using the Neutral common condition, in the P50 time window (40-  
501 64ms). This was overlaid on the previously identified pulling related activity, and showed a  
502 more anterior distribution, close to the SI hand area.

503

504



505

506 **Table 2:** Onset latency and mean amplitude for P50, N140, P200 and P3b ERPs derived  
 507 from difference waves for the three oddball conditions. Group (n=15) mean and (SD)  
 508 values shown. Note that the onset could not always be identified when using difference  
 509 waves. So for P50 onset latency n = 13 in the Opposite oddball condition and n = 14 in the  
 510 Neutral oddball condition, for N140 onset latency n = 13 in the Opposite oddball condition  
 511 and n = 11 in the Pull after Neutral condition, and for P200 onset latency n = 13 in the Pull  
 512 oddball after neutral condition and n = 14 in the Neutral oddball condition.

| Condition                         | Latency (ms)    |                   |                   |                   | Mean amplitude ( $\mu$ V) |                 |                |                |
|-----------------------------------|-----------------|-------------------|-------------------|-------------------|---------------------------|-----------------|----------------|----------------|
|                                   | P50             | N140              | P200              | P3b               | P50                       | N140            | P200           | P3b            |
| <b>Opposite oddball</b>           | 42.68<br>(10.9) | 118.77<br>(12.1)  | 173.03<br>(23.88) | 335.42<br>(40.43) | 0.16<br>(0.38)            | 0.19<br>(0.46)  | 0.68<br>(0.63) | 2.07<br>(1.45) |
| <b>Pull oddball after neutral</b> | 38.02<br>(12.2) | 115.49<br>(16.32) | 193.91<br>(25.19) | 382.84<br>(47.87) | 0.02<br>(0.2)             | 0.19<br>(0.36)  | 0.27<br>(0.5)  | 1.25<br>(1.17) |
| <b>Neutral Oddball</b>            | 45.96<br>(9.96) | 110.41<br>(15.87) | 179.31<br>(19.91) | 338.76<br>(47.16) | 0.01<br>(0.25)            | -0.17<br>(0.39) | 0.18<br>(0.63) | 1.7<br>(1.45)  |

513

514

515 **Table 3:** Statistical comparison using paired sample t-test of onset latency and mean  
 516 amplitude for P50, N140, P200 and P3b ERPs comparing the three oddball conditions.  
 517 Shown are t-values, with p-values in parenthesis (\* p < 0.05, \*\* p < 0.01, \*\*\* p < 0.001).  
 518 DF = 14, except when onset latency could not be identified. P50 latency DF = 12 for Oppo.  
 519 vs. Pull after neu. and DF = 13 for other two comparisons. N140 latency DF = 8 for Oppo.  
 520 vs. Pull after neu., DF = 12 for Oppo. vs. Neu. Oddball, and DF = 10 for Pull after neu. vs.  
 521 Neu. Oddball. P200 latency DF = 12 for Oppo. vs. Pull after neu., DF = 13 for Oppo. vs.  
 522 Neu. Oddball, DF = 11 for Pull after neu. vs. Neu. Oddball.

523

| Comparison                              | Latency           |                  |                    |                      | Mean amplitude   |                   |                   |                   |
|-----------------------------------------|-------------------|------------------|--------------------|----------------------|------------------|-------------------|-------------------|-------------------|
|                                         | P50               | N140             | P200               | P3b                  | P50              | N140              | P200              | P3b               |
| <b>Oppo. vs. Pull after neu.</b>        | 0.874<br>(0.399)  | 0.172<br>(0.867) | -2.388<br>(0.034*) | -3.84<br>(0.002**)   | 1.455<br>(0.168) | -0.099<br>(0.923) | 2.818<br>(0.014*) | 2.499<br>(0.026*) |
| <b>Oppo. vs. Neu. Oddball</b>           | -0.296<br>(0.773) | 1.024<br>(0.326) | -0.799<br>(0.439)  | -0.412<br>(0.686)    | 1.164<br>(0.264) | 2.595<br>(0.021*) | 2.240<br>(0.042*) | 1.104<br>(0.288)  |
| <b>Pull after neu. vs. Neu. Oddball</b> | -1.496<br>(0.158) | 0.531<br>(0.607) | 1.684<br>(0.120)   | 5.221<br>(<0.001***) | 0.143<br>(0.889) | 2.599<br>(0.021*) | 0.479<br>(0.639)  | -2.118<br>(0.053) |

524

525

526 **Table 4:** Results of the SPM sensor space contrast comparing the ‘Opposite pull oddball  
527 condition’ and ‘Pull oddball after neutral’ condition, using behavioral measures as  
528 covariates. Threshold was set at  $p < 0.001$  uncorrected and only clusters that passed  
529 family-wise (FWE) cluster threshold of  $p < 0.1$  were included, x position is positive-going  
530 left to right, y position is positive-going from posterior to anterior.

531

| Behavioral covariate                   | Peak Level |     |     | T value | $p_{\text{FWE corr.}}$ | Cluster Level |                        |
|----------------------------------------|------------|-----|-----|---------|------------------------|---------------|------------------------|
|                                        | x          | y   | ms  |         |                        | No. Voxels    | $p_{\text{FWE corr.}}$ |
| Pull vs Neutral discrimination         | -21        | -52 | 280 | 6.59    | 0.036                  | 757           | 0.030                  |
| Mean oddball count error               | -21        | -52 | 280 | 6.01    | 0.067                  | 537           | 0.061                  |
| Left/Right common, oddball count error | -21        | -52 | 280 | 6.10    | 0.062                  | 568           | 0.055                  |
| Neutral common, oddball count error    | -21        | -46 | 280 | 6.41    | 0.043                  | 897           | 0.020                  |

532

## 533 Discussion

534 Research using monkeys (Salimi et al., 1999; Backlund Wasling et al., 2008;  
535 Fortier-Poisson et al., 2016) and work addressing peripheral tactile processing in humans  
536 (Birznieks et al., 2001; Pruszynski and Johansson, 2014) suggested that the rapid  
537 extraction of force vectors is possible. Drawing on this, and work detailing the SI, SII and  
538 PFC circuitry involved in tactile frequency discrimination (Romo and Salinas, 2003), we  
539 formulated a sensory-frontal account of the pulling sensation. This account holds that  
540 spatial processing is not necessary for pulling sensations, and that directional pulls can be  
541 identified with reference to stored patterns of activity. In contrast, a spatial account argues  
542 that such processing is not sufficient, and that activity in the somatosensory association  
543 cortex is instead required for the pulling sensation to emerge. We used high-density EEG,  
544 combined with an illusory pulling sensation embedded within an oddball task, and found  
545 evidence that supported this latter, somatosensory association cortex account.

## 546 Evidence against an early sensory-frontal account of pulling sensations

547 The sensory-frontal account predicted that pulling sensations should enhance the  
548 N140, either directly, because of shared underlying mechanisms, or indirectly because of  
549 the redirection of attention. Direct enhancement was suggested by the fact that the N140  
550 generators overlap with the SII and PFC circuitry involved in tactile frequency  
551 discrimination (Allison et al., 1992; Frot et al., 1999; Valeriani et al., 2001; de Lafuente and

552 Romo, 2006), and because the N140 indexes somatosensory awareness (Aukstulewicz  
553 et al., 2012; Aukstulewicz and Blankenburg, 2013; Forschack et al., 2020; Schröder et al.,  
554 2021) and texture perception (Genna et al., 2018), processes closely related to the pulling  
555 sensation. Indirectly, the N140 is implicated in the detection of oddballs (Kekoni et al.,  
556 1997; Andrew et al., 2020), and with both endogenous and exogenous tactile attention  
557 (Nakajima and Imamura, 2000). As such, if the pulling sensation emerged upstream of  
558 N140 generators, greater attention should have been directed towards the stimulus,  
559 resulting in downstream N140 enhancement (Forster and Eimer, 2004).

560 However, we did not find any such pulling-related enhancements of the N140. We  
561 observed the opposite: pulling sensations slightly attenuated the N140, while neutral  
562 oddball stimuli actually produced a larger N140 than pulling oddballs. This result suggests  
563 that the sensory-frontal account is unlikely to be correct and that pulling sensations  
564 emerged via alternate mechanisms. Conversely, neutral oddballs (symmetric vibration),  
565 which participants reported being subjectively similar to asymmetric vibration aside from  
566 the absence of the pulling sensation, were apparently processed in a manner more similar  
567 to how vibration frequency is discriminated.

568 Our N140 findings constrain theoretical accounts, since they suggest that the  
569 pulling sensation does not emerge during the initial stages of somatosensory processing.  
570 Consistent with this, we did not observe any pulling-related P50 effects, although little can  
571 be concluded from this null result. Indeed, our results do not contradict earlier research  
572 involving monkeys that reported rapid SI processing of tangential forces (Salimi et al.,  
573 1999). Early processing in SI is undoubtedly necessary, but as our results show, likely not  
574 sufficient for the pulling sensation to emerge. Moreover, we found that later pulling-related  
575 activity (264-320ms) did overlap with the posterior portion of SI. SI may contribute to  
576 awareness of the pulling sensation via reentrant activity from the parietal lobe  
577 (Aukstulewicz et al., 2012; Meador et al., 2017).

#### 578 **A somatosensory association cortex account of the pulling sensation**

579 Pulling related activity occurred 264-320ms post-stimulus, beginning and peaking  
580 (280ms) over the contralateral parietal lobe. Source localization indicated an origin in the  
581 postcentral sulcus, SPL, and IPS, posterior to an independent localization of SI. This  
582 pattern of activity is consistent with a spatial account of the pulling sensation, specifically  
583 that feeling a directional tactile pull depends on the integration of body location processing  
584 with processing of the force vector orientation and direction in space.

585 Unlike other bodily illusions involving illusory external forces (De Havas et al., 2017,  
586 2018), asymmetric vibration produces a clear sensation that the hand is being pulled yet is  
587 stationary. The brain therefore needs to determine that the hand is not moving despite an  
588 apparent external force. The postcentral sulcus may contribute to the pulling sensation by

589 providing input regarding hand position, since this is a key somatosensory area for  
590 proprioception (Soechting and Flanders, 1989; Cohen and Andersen, 2002; London and  
591 Miller, 2013; Chowdhury et al., 2020) and is involved in generating vibration-based  
592 proprioceptive body illusions (Ehrsson et al., 2005).

593 Our parietal cluster of pulling-related activity was centered on the IPS, which may  
594 contribute to the pulling sensation by extracting the orientation of the illusory force vector,  
595 as with the orientation of graspable objects (Hadjikhani and Roland, 1998; Frey et al.,  
596 2005; Van Boven et al., 2005; Wacker et al., 2011; Leoné et al., 2015). IPS activity might  
597 also be related to anticipatory grip control (Ehrsson et al., 2003; van Polanen et al., 2020),  
598 indicating that such control can be decoupled from the actual need to adjust grip strength.

599 The SPL is involved in spatial cognition (Colby and Goldberg, 1999; Sack, 2009),  
600 body location processing (Graziano et al., 2000; Felician et al., 2004) and transformations  
601 into body centered reference frames (Lacquaniti et al., 1995; Gallivan et al., 2009). To  
602 determine where a pull is directed, and to dissociate pulls from merely moving tactile  
603 stimuli (Lin and Kajola, 2003; Oh et al., 2017), processes in the SPL could map an  
604 extracted force vector in hand or externally-centered coordinates.

605 The poor spatial acuity of EEG means we cannot be certain which of these brain  
606 areas represent the true loci of pulling related activity. Nevertheless, we can be confident  
607 about the temporal evolution of the pulling sensation, which emerged 280ms post-stimulus  
608 and modified the P200. Pulling-related activity can therefore be temporally dissociated  
609 from the predominantly feedforward processing in SI and SII (< 70ms), as well as from the  
610 initial engagement of the parietal cortex (70-100ms), which, during oddball tasks, is likely  
611 related to identifying the unusualness of the stimulus (Huang et al., 2005). Instead, the  
612 timing of the pulling related activity is similar to other somatosensory illusions, such as the  
613 rubber hand illusion, which has recently been found to be associated with parietal and  
614 frontal activity 200-300ms post-stimulus (Rao and Kayser, 2017; Guterstam et al., 2019).  
615 Of more direct relevance, the temporal characteristics of the pulling sensation are  
616 consistent with tactile remapping. Tactile remapping, whereby a force vector is  
617 transformed into bodily centered coordinate system, depends on activity in the SPL and  
618 IPS (Azañón et al., 2010; Ritterband-Rosenbaum et al., 2014; Heed et al., 2015), takes  
619 place after initial somatosensory processing has been completed, and is closely  
620 associated with the P200 (Longo et al., 2012; Bufalari et al., 2014). Thus, converging lines  
621 of evidence point towards a spatial, parietal cortex account of the pulling sensation.

## 622 **Processing related to the violation and updating of sensory expectations**

623 Comparing opposite direction oddballs to the same oddballs after neutral stimuli  
624 was designed to isolate activity specific to having directional pulling expectations violated  
625 by directional pulling sensations. We are therefore acknowledging an inherently predictive

626 account of perception (Berthoz, 2000; Friston, 2005). However, it is difficult to exclude  
627 activity related to the process of comparison itself (Garrido et al., 2009; Camalier et al.,  
628 2019).

629 Two caveats must be addressed. Firstly, within a Bayesian framework, our main  
630 result, that opposite pull oddballs produced larger parietal activity than the same oddballs  
631 in the context of neutral common stimuli, could be argued to be due to neutral common  
632 stimuli forming weaker priors than pulling stimuli, which in turn would produce a smaller  
633 response when the priors were confounded by the oddball. This argument, however, is not  
634 wholly convincing because opposite pull oddballs produced a larger P200 response than  
635 neutral oddballs, despite having matched common stimuli, and thus the same priors.  
636 Additionally, neutral common stimuli produced slightly larger ERPs than pulling common  
637 stimuli, suggesting comparable or greater salience, and rendering weaker priors doubtful.

638 A second, related caveat, is that the parietal lobe activity we observed might reflect  
639 the contradiction of an expected pulling direction by *any* tactile stimulus, since we did not  
640 observe the same pattern of activity when contrasting opposite pull oddballs with neutral  
641 oddballs. This result was likely due to the inherent uncertainty of the neutral stimulus when  
642 acting as an oddball, a factor known to amplify long-latency ERPs (Stern et al., 2010; Furl  
643 and Averbeck, 2011; Kopp et al., 2016), and explaining the large P3b found in the Neutral  
644 oddball condition.

645 After the pulling sensation has been generated and its direction determined,  
646 stimulus classification and memory updating processes can begin; processes indexed by  
647 the P3b (Polich, 2007). Earlier and larger P3b responses for opposite direction oddballs  
648 were probably observed because the extracted oddball pulling direction was maximally  
649 different from the common stimulus extracted direction (Miltner et al., 1989; Nakajima and  
650 Imamura, 2000).

## 651 **Conclusion**

652 Our findings suggest the sensation of being pulled emerges through parietal lobe  
653 activity 280ms post-stimulus, related to processing proprioception, tactile orientation and  
654 peripersonal space. This first step towards a spatiotemporally precise account of the  
655 pulling sensation will aid the development of handheld vibration devices for gaming,  
656 navigation and guiding the visually impaired (Amemiya and Sugiyama, 2010; Takamuku et  
657 al., 2016; Gomi et al., 2019) and may shed light on the role of pulling sensations in parent-  
658 infant communication and developmental disorders characterized by somatosensory  
659 deficits (Cascio, 2010). Understanding the neural mechanisms of the pulling sensation  
660 delineates its commonalities and differences with other sensorimotor processes, such as  
661 tactile motion detection, grasping control and bodily awareness, furthering a more  
662 complete account of parietal lobe function.

663

## 664 **Acknowledgements**

665 This work was supported by Grants-in-Aid for Scientific Research (JP16H06566) from  
666 Japan Society for the Promotion of Science to HG, and by a research contract between  
667 NTT and UCL.

668

## 669 **Author contributions**

670 JDH, SI and HG conceived the study and designed the experiments. JDH and SI collected  
671 the data. JDH, SB and HG conceived the data analysis. JDH analyzed the data. JDH, SB  
672 and HG wrote the manuscript. All authors provided comments and approved the  
673 manuscript.

## 674 **Declaration of interests**

675 The authors declare no competing interests.

676

## 677 **References**

- 678 Akatsuka K, Wasaka T, Nakata H, Inui K, Hoshiyama M, Kakigi R (2005) Mismatch  
679 responses related to temporal discrimination of somatosensory stimulation. *Clin*  
680 *Neurophysiol Off J Int Fed Clin Neurophysiol* 116:1930–1937.
- 681 Akatsuka K, Wasaka T, Nakata H, Kida T, Kakigi R (2007) The effect of stimulus  
682 probability on the somatosensory mismatch field. *Exp Brain Res* 181:607–614.
- 683 Allison T, McCarthy G, Wood CC (1992) The relationship between human long-latency  
684 somatosensory evoked potentials recorded from the cortical surface and from the  
685 scalp. *Electroencephalogr Clin Neurophysiol* 84:301–314.
- 686 Amemiya T, Ando H, Maeda T (2005) Virtual force display: direction guidance using  
687 asymmetric acceleration via periodic translational motion. In: *First Joint*  
688 *Eurohaptics Conference and Symposium on Haptic Interfaces for Virtual*  
689 *Environment and Teleoperator Systems*. World Haptics Conference, pp 619–622.
- 690 Amemiya T, Gomi H (2014) Distinct Pseudo-Attraction Force Sensation by a Thumb-Sized  
691 Vibrator that Oscillates Asymmetrically. In: *Haptics: Neuroscience, Devices,*  
692 *Modeling, and Applications* (Auvray M, Duriez C, eds), pp 88–95 *Lecture Notes in*  
693 *Computer Science*. Berlin, Heidelberg: Springer.
- 694 Amemiya T, Gomi H (2016) Active Manual Movement Improves Directional Perception of  
695 Illusory Force. *IEEE Trans Haptics* 9:465–473.

- 696 Amemiya T, Maeda T (2008) Asymmetric Oscillation Distorts the Perceived Heaviness of  
697 Handheld Objects. *IEEE Trans Haptics* 1:9–18.
- 698 Amemiya T, Sugiyama H (2010) Orienting Kinesthetically: A Haptic Handheld Wayfinder  
699 for People with Visual Impairments. *ACM Trans Access Comput* 3:6:1-6:23.
- 700 Andrew D, Ibey RJ, Staines WR (2020) Transient inhibition of the cerebellum impairs  
701 change-detection processes: Cerebellar contributions to sensorimotor integration.  
702 *Behav Brain Res* 378:112273.
- 703 Aukstulewicz R, Blankenburg F (2013) Subjective rating of weak tactile stimuli is  
704 parametrically encoded in event-related potentials. *J Neurosci Off J Soc Neurosci*  
705 33:11878–11887.
- 706 Aukstulewicz R, Spitzer B, Blankenburg F (2012) Recurrent Neural Processing and  
707 Somatosensory Awareness. *J Neurosci* 32:799–805.
- 708 Azañón E, Longo MR, Soto-Faraco S, Haggard P (2010) The Posterior Parietal Cortex  
709 Remaps Touch into External Space. *Curr Biol* 20:1304–1309.
- 710 Backlund Wasling H, Lundblad L, Löken L, Wessberg J, Wiklund K, Norrsell U, Olausson  
711 H (2008) Cortical processing of lateral skin stretch stimulation in humans. *Exp*  
712 *Brain Res* 190:117–124.
- 713 Badde S, Heed T (2016) Towards explaining spatial touch perception: Weighted  
714 integration of multiple location codes. *Cogn Neuropsychol* 33:26–47.
- 715 Berthoz A (2000) *The Brain's Sense of Movement*. Harvard University Press.
- 716 Birznieks I, Jenmalm P, Goodwin AW, Johansson RS (2001) Encoding of direction of  
717 fingertip forces by human tactile afferents. *J Neurosci Off J Soc Neurosci* 21:8222–  
718 8237.
- 719 Brainard DH (1997) *The Psychophysics Toolbox*. *Spat Vis* 10:433–436.
- 720 Bufalari I, Di Russo F, Aglioti SM (2014) Illusory and veridical mapping of tactile objects in  
721 the primary somatosensory and posterior parietal cortex. *Cereb Cortex N Y N 1991*  
722 24:1867–1878.
- 723 Camalier CR, Scarim K, Mishkin M, Averbek BB (2019) A Comparison of Auditory  
724 Oddball Responses in Dorsolateral Prefrontal Cortex, Basolateral Amygdala, and  
725 Auditory Cortex of Macaque. *J Cogn Neurosci* 31:1054–1064.
- 726 Cascio CJ (2010) Somatosensory processing in neurodevelopmental disorders. *J*  
727 *Neurodev Disord* 2:62–69.
- 728 Chowdhury RH, Glaser JI, Miller LE (2020) Area 2 of primary somatosensory cortex  
729 encodes kinematics of the whole arm. *eLife* 9.

- 730 Cohen YE, Andersen RA (2002) A common reference frame for movement plans in the  
731 posterior parietal cortex. *Nat Rev Neurosci* 3:553–562.
- 732 Colby CL, Goldberg ME (1999) Space and attention in parietal cortex. *Annu Rev Neurosci*  
733 22:319–349.
- 734 De Havas J, Gomi H, Haggard P (2017) Experimental investigations of control principles of  
735 involuntary movement: a comprehensive review of the Kohnstamm phenomenon.  
736 *Exp Brain Res*.
- 737 De Havas J, Ito S, Haggard P, Gomi H (2018) Low Gain Servo Control During the  
738 Kohnstamm Phenomenon Reveals Dissociation Between Low-Level Control  
739 Mechanisms for Involuntary vs. Voluntary Arm Movements. *Front Behav Neurosci*  
740 12 Available at: <https://www.frontiersin.org/articles/10.3389/fnbeh.2018.00113/full>  
741 [Accessed May 30, 2018].
- 742 de Lafuente V, Romo R (2006) Neural correlate of subjective sensory experience gradually  
743 builds up across cortical areas. *Proc Natl Acad Sci U S A* 103:14266–14271.
- 744 Delorme A, Makeig S (2004) EEGLAB: an open source toolbox for analysis of single-trial  
745 EEG dynamics including independent component analysis. *J Neurosci Methods*  
746 134:9–21.
- 747 Desmedt JE, Tomberg C (1989) Mapping early somatosensory evoked potentials in  
748 selective attention: critical evaluation of control conditions used for titrating by  
749 difference the cognitive P30, P40, P100 and N140. *Electroencephalogr Clin*  
750 *Neurophysiol* 74:321–346.
- 751 Driver J, Spence C (1998) Cross-modal links in spatial attention. *Philos Trans R Soc B Biol*  
752 *Sci* 353:1319–1331.
- 753 Ehrsson HH, Fagergren A, Johansson RS, Forssberg H (2003) Evidence for the  
754 Involvement of the Posterior Parietal Cortex in Coordination of Fingertip Forces for  
755 Grasp Stability in Manipulation. *J Neurophysiol* 90:2978–2986.
- 756 Ehrsson HH, Kito T, Sadato N, Passingham RE, Naito E (2005) Neural Substrate of Body  
757 Size: Illusory Feeling of Shrinking of the Waist. *PLOS Biol* 3:e412.
- 758 Eickhoff SB, Stephan KE, Mohlberg H, Grefkes C, Fink GR, Amunts K, Zilles K (2005) A  
759 new SPM toolbox for combining probabilistic cytoarchitectonic maps and functional  
760 imaging data. *NeuroImage* 25:1325–1335.
- 761 Felician O, Romaguère P, Anton J-L, Nazarian B, Roth M, Poncet M, Roll J-P (2004) The  
762 role of human left superior parietal lobule in body part localization. *Ann Neurol*  
763 55:749–751.
- 764 Forschack N, Nierhaus T, Müller MM, Villringer A (2020) Dissociable neural correlates of  
765 stimulation intensity and detection in somatosensation. *NeuroImage* 217:116908.



- 766 Forster B, Eimer M (2004) The attentional selection of spatial and non-spatial attributes in  
767 touch: ERP evidence for parallel and independent processes. *Biol Psychol* 66:1–20.
- 768 Fortier-Poisson P, Langlais J-S, Smith AM (2016) Correlation of fingertip shear force  
769 direction with somatosensory cortical activity in monkey. *J Neurophysiol* 115:100–  
770 111.
- 771 Fortier-Poisson P, Smith AM (2016) Neuronal activity in somatosensory cortex related to  
772 tactile exploration. *J Neurophysiol* 115:112–126.
- 773 Franz M, Schmidt B, Hecht H, Naumann E, Miltner WHR (2020) Suggested deafness  
774 during hypnosis and simulation of hypnosis compared to a distraction and control  
775 condition: A study on subjective experience and cortical brain responses. *PloS One*  
776 15:e0240832.
- 777 Frey SH, Vinton D, Norlund R, Grafton ST (2005) Cortical topography of human anterior  
778 intraparietal cortex active during visually guided grasping. *Brain Res Cogn Brain*  
779 *Res* 23:397–405.
- 780 Friston K (2005) A theory of cortical responses. *Philos Trans R Soc Lond B Biol Sci*  
781 360:815–836.
- 782 Frot M, Rambaud L, Guénot M, Mauguière F (1999) Intracortical recordings of early pain-  
783 related CO<sub>2</sub>-laser evoked potentials in the human second somatosensory (SII)  
784 area. *Clin Neurophysiol Off J Int Fed Clin Neurophysiol* 110:133–145.
- 785 Furl N, Averbeck BB (2011) Parietal cortex and insula relate to evidence seeking relevant  
786 to reward-related decisions. *J Neurosci Off J Soc Neurosci* 31:17572–17582.
- 787 Gallivan JP, Cavina-Pratesi C, Culham JC (2009) Is that within reach? fMRI reveals that  
788 the human superior parieto-occipital cortex encodes objects reachable by the hand.  
789 *J Neurosci Off J Soc Neurosci* 29:4381–4391.
- 790 Garrido MI, Kilner JM, Stephan KE, Friston KJ (2009) The mismatch negativity: a review of  
791 underlying mechanisms. *Clin Neurophysiol Off J Int Fed Clin Neurophysiol*  
792 120:453–463.
- 793 Genna C, Oddo C, Fanciullacci C, Chisari C, Micera S, Artoni F (2018) Bilateral cortical  
794 representation of tactile roughness. *Brain Res* 1699:79–88.
- 795 Gomi H, Ito S, Tanase R (2019) Innovative mobile force display: Buru-Navi. In:  
796 *International Display Workshops*. Sapporo, Japan.
- 797 Graziano MS, Cooke DF, Taylor CS (2000) Coding the location of the arm by sight.  
798 *Science* 290:1782–1786.

- 799 Grech R, Cassar T, Muscat J, Camilleri KP, Fabri SG, Zervakis M, Xanthopoulos P,  
800 Sakkalis V, Vanrumste B (2008) Review on solving the inverse problem in EEG  
801 source analysis. *J NeuroEngineering Rehabil* 5:25.
- 802 Guterstam A, Collins KL, Cronin JA, Zeberg H, Darvas F, Weaver KE, Ojemann JG,  
803 Ehrsson HH (2019) Direct Electrophysiological Correlates of Body Ownership in  
804 Human Cerebral Cortex. *Cereb Cortex N Y N* 1991 29:1328–1341.
- 805 Hadjikhani N, Roland PE (1998) Cross-modal transfer of information between the tactile  
806 and the visual representations in the human brain: A positron emission  
807 tomographic study. *J Neurosci Off J Soc Neurosci* 18:1072–1084.
- 808 Heed T, Buchholz VN, Engel AK, Röder B (2015) Tactile remapping: from coordinate  
809 transformation to integration in sensorimotor processing. *Trends Cogn Sci* 19:251–  
810 258.
- 811 Hernández A, Nácher V, Luna R, Zainos A, Lemus L, Alvarez M, Vázquez Y, Camarillo L,  
812 Romo R (2010) Decoding a perceptual decision process across cortex. *Neuron*  
813 66:300–314.
- 814 Holmes NP, Tamè L, Beeching P, Medford M, Rakova M, Stuart A, Zeni S (2019) Locating  
815 primary somatosensory cortex in human brain stimulation studies: experimental  
816 evidence. *J Neurophysiol* 121:336–344.
- 817 Huang M-X, Lee RR, Miller GA, Thoma RJ, Hanlon FM, Paulson KM, Martin K, Harrington  
818 DL, Weisend MP, Edgar JC, Canive JM (2005) A parietal-frontal network studied  
819 by somatosensory oddball MEG responses, and its cross-modal consistency.  
820 *NeuroImage* 28:99–114.
- 821 Johansson RS, Flanagan JR (2009) Coding and use of tactile signals from the fingertips in  
822 object manipulation tasks. *Nat Rev Neurosci* 10:345–359.
- 823 Johansson RS, Hger C, Bäckström L (1992a) Somatosensory control of precision grip  
824 during unpredictable pulling loads. III. Impairments during digital anesthesia. *Exp*  
825 *Brain Res* 89:204–213.
- 826 Johansson RS, Riso R, Häger C, Bäckström L (1992b) Somatosensory control of precision  
827 grip during unpredictable pulling loads. I. Changes in load force amplitude. *Exp*  
828 *Brain Res* 89:181–191.
- 829 Kekoni J, Hämäläinen H, Saarinen M, Gröhn J, Reinikainen K, Lehtokoski A, Näätänen R  
830 (1997) Rate effect and mismatch responses in the somatosensory system: ERP-  
831 recordings in humans. *Biol Psychol* 46:125–142.
- 832 Kida T, Nishihira Y, Hatta A, Wasaka T (2003) Somatosensory N250 and P300 during  
833 discrimination tasks. *Int J Psychophysiol Off J Int Organ Psychophysiol* 48:275–  
834 283.

- 835 Kilner JM, Friston KJ (2010) TOPOLOGICAL INFERENCE FOR EEG AND MEG. *Ann*  
836 *Appl Stat* 4:1272–1290.
- 837 Kopp B, Seer C, Lange F, Kluytmans A, Kolossa A, Fingscheidt T, Hoijtink H (2016) P300  
838 amplitude variations, prior probabilities, and likelihoods: A Bayesian ERP study.  
839 *Cogn Affect Behav Neurosci* 16:911–928.
- 840 Lacquaniti F, Guigon E, Bianchi L, Ferraina S, Caminiti R (1995) Representing spatial  
841 information for limb movement: role of area 5 in the monkey. *Cereb Cortex N Y N*  
842 *1991* 5:391–409.
- 843 Leoné FTM, Monaco S, Henriques DYP, Toni I, Medendorp WP (2015) Flexible Reference  
844 Frames for Grasp Planning in Human Parietofrontal Cortex. *eNeuro* 2.
- 845 Lin Y-Y, Kajola M (2003) Neuromagnetic somatosensory responses to natural moving  
846 tactile stimulation. *Can J Neurol Sci J Can Sci Neurol* 30:31–35.
- 847 Litvak V, Friston K (2008) Electromagnetic source reconstruction for group studies.  
848 *NeuroImage* 42:1490–1498.
- 849 Litvak V, Mattout J, Kiebel S, Phillips C, Henson R, Kilner J, Barnes G, Oostenveld R,  
850 Daunizeau J, Flandin G, Penny W, Friston K (2011) EEG and MEG data analysis in  
851 SPM8. *Comput Intell Neurosci* 2011:852961.
- 852 London BM, Miller LE (2013) Responses of somatosensory area 2 neurons to actively and  
853 passively generated limb movements. *J Neurophysiol* 109:1505–1513.
- 854 Longo MR, Musil JJ, Haggard P (2012) Visuo-tactile integration in personal space. *J Cogn*  
855 *Neurosci* 24:543–552.
- 856 Lopez-Calderon J, Luck SJ (2014) ERPLAB: an open-source toolbox for the analysis of  
857 event-related potentials. *Front Hum Neurosci* 8:213.
- 858 Luck SJ (2014) *An Introduction to the Event-Related Potential Technique*. MIT Press.
- 859 Meador KJ, Revill KP, Epstein CM, Sathian K, Loring DW, Rorden C (2017) Neuroimaging  
860 somatosensory perception and masking. *Neuropsychologia* 94:44–51.
- 861 Miltner W, Johnson R, Braun C, Larbig W (1989) Somatosensory event-related potentials  
862 to painful and non-painful stimuli: effects of attention. *Pain* 38:303–312.
- 863 Nakajima Y, Imamura N (2000) Relationships between attention effects and intensity  
864 effects on the cognitive N140 and P300 components of somatosensory ERPs. *Clin*  
865 *Neurophysiol Off J Int Fed Clin Neurophysiol* 111:1711–1718.
- 866 Oh H, Custead R, Wang Y, Barlow S (2017) Neural encoding of saltatory pneumotactile  
867 velocity in human glabrous hand. *PLOS ONE* 12:e0183532.

- 868 Oh Y, Chesebrough C, Erickson B, Zhang F, Kounios J (2020) An insight-related neural  
869 reward signal. *NeuroImage* 214:116757.
- 870 Panarese A, Edin BB (2011) Human ability to discriminate direction of three-dimensional  
871 force stimuli applied to the finger pad. *J Neurophysiol* 105:541–547.
- 872 Polich J (2007) Updating P300: an integrative theory of P3a and P3b. *Clin Neurophysiol*  
873 *Off J Int Fed Clin Neurophysiol* 118:2128–2148.
- 874 Pruszynski JA, Flanagan JR, Johansson RS (2018) Fast and accurate edge orientation  
875 processing during object manipulation. *eLife* 7.
- 876 Pruszynski JA, Johansson RS (2014) Edge-orientation processing in first-order tactile  
877 neurons. *Nat Neurosci* 17:1404–1409.
- 878 Pulvermüller F, Shtyrov Y, Ilmoniemi RJ, Marslen-Wilson WD (2006) Tracking speech  
879 comprehension in space and time. *NeuroImage* 31:1297–1305.
- 880 Rao IS, Kayser C (2017) Neurophysiological Correlates of the Rubber Hand Illusion in  
881 Late Evoked and Alpha/Beta Band Activity. *Front Hum Neurosci* 11:377.
- 882 Restuccia D, Zanini S, Cazzagon M, Del Piero I, Martucci L, Della Marca G (2009)  
883 Somatosensory mismatch negativity in healthy children. *Dev Med Child Neurol*  
884 51:991–998.
- 885 Ritterband-Rosenbaum A, Hermsillo R, Kroliczak G, van Donkelaar P (2014) Hand  
886 position-dependent modulation of errors in vibrotactile temporal order judgments:  
887 the effects of transcranial magnetic stimulation to the human posterior parietal  
888 cortex. *Exp Brain Res* 232:1689–1698.
- 889 Romo R, Salinas E (2003) Flutter Discrimination: neural codes, perception, memory and  
890 decision making. *Nat Rev Neurosci* 4:203–218.
- 891 Sack AT (2009) Parietal cortex and spatial cognition. *Behav Brain Res* 202:153–161.
- 892 Salimi I, Brochier T, Smith AM (1999) Neuronal activity in somatosensory cortex of  
893 monkeys using a precision grip. III. Responses to altered friction perturbations. *J*  
894 *Neurophysiol* 81:845–857.
- 895 Schröder P, Nierhaus T, Blankenburg F (2021) Dissociating Perceptual Awareness and  
896 Postperceptual Processing: The P300 Is Not a Reliable Marker of Somatosensory  
897 Target Detection. *J Neurosci* 41:4686–4696.
- 898 Shen G, Smyk NJ, Meltzoff AN, Marshall PJ (2018) Using somatosensory mismatch  
899 responses as a window into somatotopic processing of tactile stimulation.  
900 *Psychophysiology* 55:e13030.

- 901 Shinozaki N, Yabe H, Sutoh T, Hiruma T, Kaneko S (1998) Somatosensory automatic  
902 responses to deviant stimuli. *Brain Res Cogn Brain Res* 7:165–171.
- 903 Soechting JF, Flanders M (1989) Errors in pointing are due to approximations in  
904 sensorimotor transformations. *J Neurophysiol* 62:595–608.
- 905 Spackman LA, Boyd SG, Towell A (2007) Effects of stimulus frequency and duration on  
906 somatosensory discrimination responses. *Exp Brain Res* 177:21–30.
- 907 Stern ER, Gonzalez R, Welsh RC, Taylor SF (2010) Updating beliefs for a decision: neural  
908 correlates of uncertainty and underconfidence. *J Neurosci Off J Soc Neurosci*  
909 30:8032–8041.
- 910 Takamuku S, Amemiya T, Ito S, Gomi H (2016) Design of Illusory Force Sensation for  
911 Virtual Fishing. *Trans Hum Interface Soc* 18:87–94.
- 912 Tanabe T, Yano H, Iwata H (2018) Evaluation of the Perceptual Characteristics of a Force  
913 Induced by Asymmetric Vibrations. *IEEE Trans Haptics* 11:220–231.
- 914 Tappeiner HW, Klatzky RL, Unger B, Hollis R (2009) Good vibrations: Asymmetric  
915 vibrations for directional haptic cues. In: *World Haptics 2009 - Third Joint*  
916 *EuroHaptics conference and Symposium on Haptic Interfaces for Virtual*  
917 *Environment and Teleoperator Systems*, pp 285–289.
- 918 Valeriani M, Fraioli L, Ranghi F, Giaquinto S (2001) Dipolar source modeling of the P300  
919 event-related potential after somatosensory stimulation. *Muscle Nerve* 24:1677–  
920 1686.
- 921 Van Boven RW, Ingeholm JE, Beauchamp MS, Bikle PC, Ungerleider LG (2005) Tactile  
922 form and location processing in the human brain. *Proc Natl Acad Sci U S A*  
923 102:12601–12605.
- 924 van Polanen V, Rens G, Davare M (2020) The role of the anterior intraparietal sulcus and  
925 the lateral occipital cortex in fingertip force scaling and weight perception during  
926 object lifting. *J Neurophysiol* 124:557–573.
- 927 Wacker E, Spitzer B, Lützkendorf R, Bernarding J, Blankenburg F (2011) Tactile motion  
928 and pattern processing assessed with high-field fMRI. *PLoS One* 6:e24860.
- 929
